# Supplementary material for: Monitoring phage-induced lysis of gram-negatives in real time using a fluorescent DNA dye
Source: PubMed Central journal article supplement (PMC9842612; doi:10.1038/s41598-023-27734-w), 2023-01-16
Supplement: 41598_2023_27734_MOESM1_ESM.pdf [file 41598_2023_27734_MOESM1_ESM.pdf]

# Supplementary materials

## Monitoring phage-induced lysis of Gram-negatives in real time using a fluorescent DNA dye

Julia E. Egado<sup>1</sup>, Catherine Toner-Bartelds<sup>1</sup>, Ana Rita Costa<sup>2,3,4</sup>, Stan J. J. Brouns<sup>2,3,4</sup>, Suzan H. M. Rooijackers<sup>1</sup>, Bart W. Bardoel<sup>1</sup>, Pieter-Jan Haas<sup>1\*</sup>

<sup>1</sup>*Medical Microbiology, University Medical Center Utrecht, Utrecht University, Utrecht, Netherlands*

<sup>2</sup>*Department of Bionanoscience, Delft University of Technology, Delft, Netherlands*

<sup>3</sup>*Kavli Institute of Nanoscience, Delft, Netherlands*

<sup>4</sup>*Fagenbank, Delft, Netherlands*

\*Corresponding author: [p.j.a.haas@umcutrecht.nl](mailto:p.j.a.haas@umcutrecht.nl)

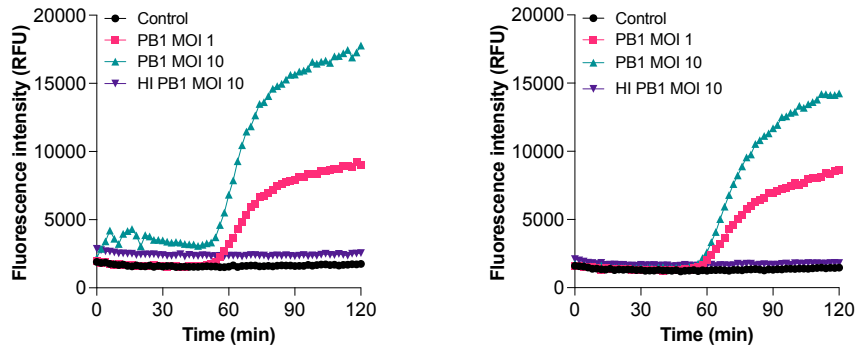

**Figure S1. Fluorescence intensity over time of *P. aeruginosa* infected with phage PB1 at an MOI of 1 and 10.** Control are uninfected bacteria. Bacteria infected with heat-inactivated (HI) PB1 at an MOI of 10 are shown as a further control. Two additional replicates to figure 1b are shown.

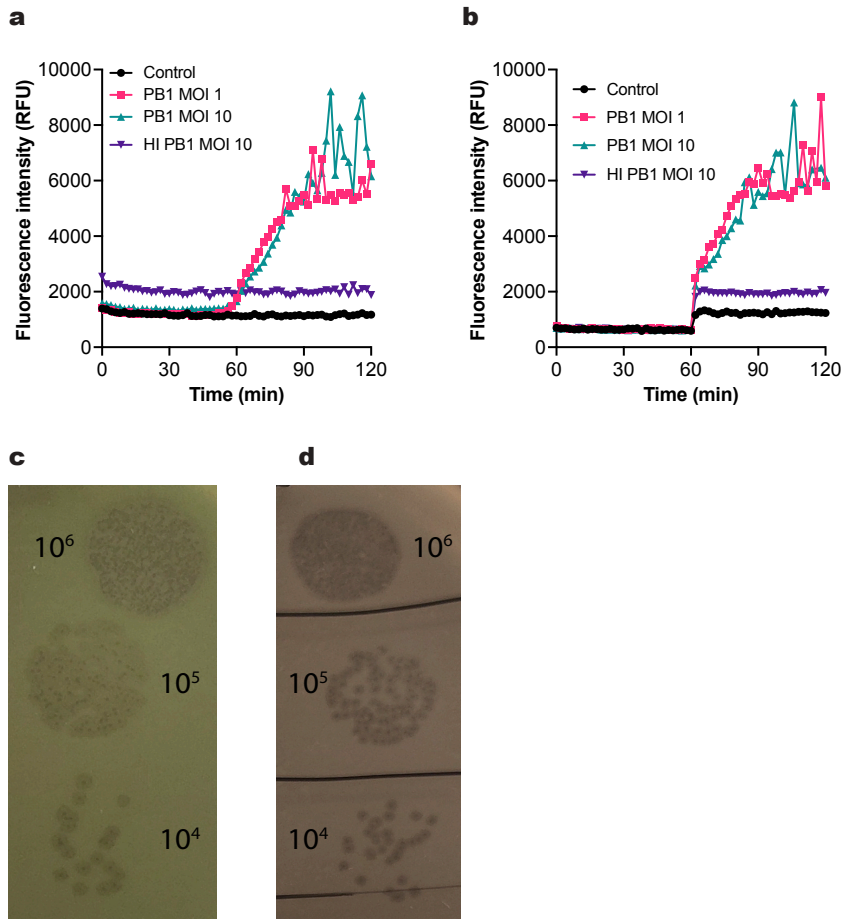

**Figure S2. Infectivity of phage PB1 is not affected by Sytox green.** a,b) Fluorescence intensity over time of *P. aeruginosa* infected with phage PB1 at an MOI of 1 and 10. Control are uninfected bacteria. Bacteria infected with heat-inactivated (HI) PB1 at an MOI of 10 are shown as a further control. Sytox green (5  $\mu$ M) was added prior to measuring (a) or after 60 minutes (b). c,d) Spot tests performed with PB1 incubated for 2 hours in absence (c) or presence (d) of Sytox green (5  $\mu$ M). Estimated phage concentrations in pfu/mL are indicated.



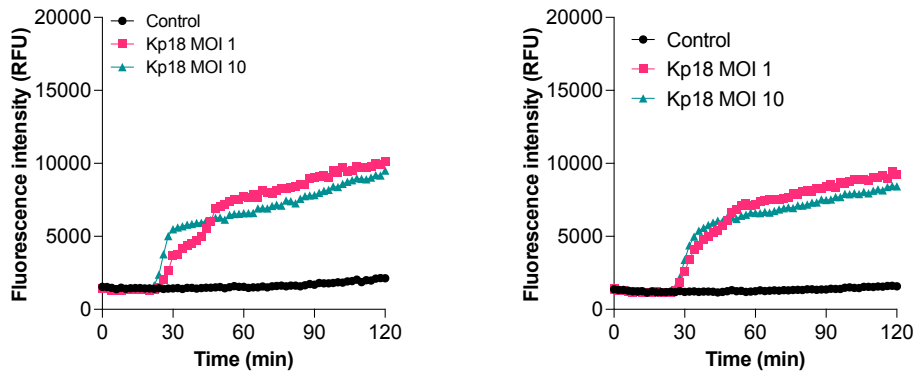

**Figure S3. Fluorescence intensity over time of *K. pneumoniae* infected with phage Kp18 at an MOI of 1 and 10.** Control are uninfected bacteria. Two additional replicates to figure 1c are shown.

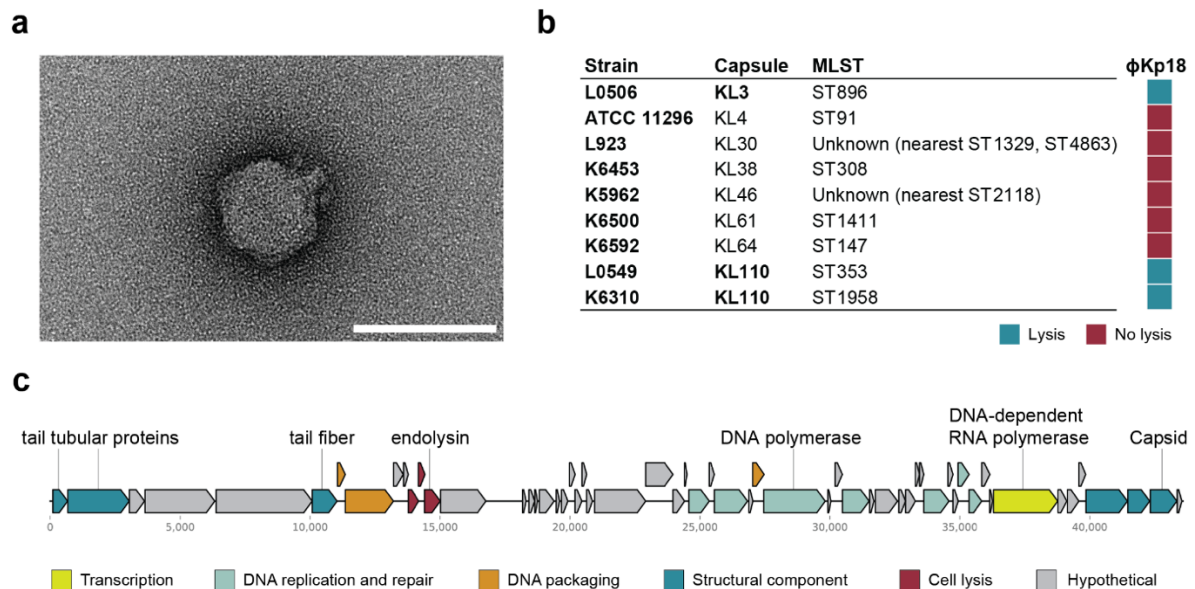

**Figure S4. Characteristics of *Klebsiella* phage vB\_KpP\_FBKp18.** **a)** Transmission electron microscopy image of  $\phi$ Kp18 negatively stained with 2% uranyl acetate. Scale bar, 80 nm. Micrograph taken at 200,000x magnification. **b)** Infectivity of phage  $\phi$ Kp18 against *K. pneumoniae* strains of different capsular (KL) and multiple sequence locus (MLST) types. **c)** Linear genome map of  $\phi$ Kp18. ORFs are colored according to predicted function as shown in the key.

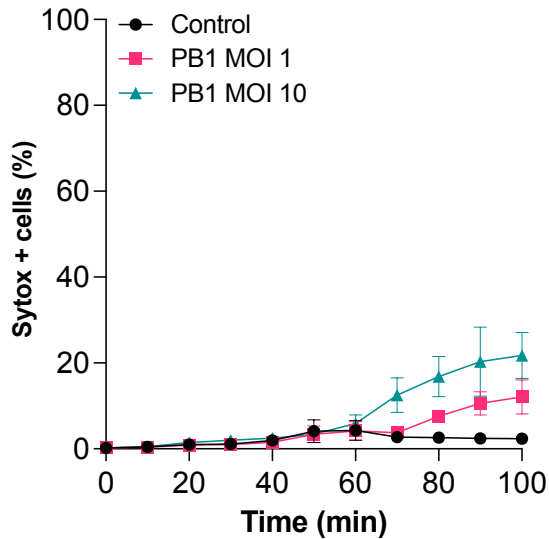

**Figure S5. Part of the bacterial population can become permeable to the dye Sytox before lysing as a result of phage infection.** Percentage of Sytox blue-positive cells of a GFP-positive *P. aeruginosa* population in the first 100 minutes after infection with phage PB1 at an MOI of 1 or 10, as determined by means of flow cytometry. An uninfected population is shown as control. Data represent mean  $\pm$  SD of three independent experiments.

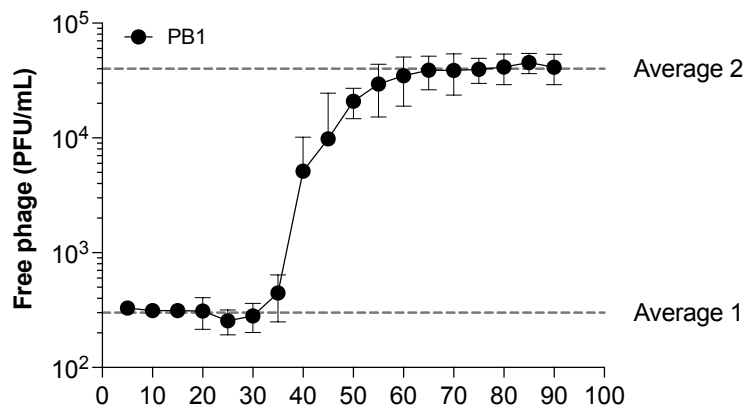

Average 1 = 300 PFU/mL

Average 2 = 40017 PFU/mL

Adsorption control (average) = 58 PFU/mL

Burst size = Average 2 / (Average 1 - Adsorption control) = 165

**Figure S6. One-step growth curve of phage PB1 and calculation of its burst size, as described by Kropinski (2018)[14].**

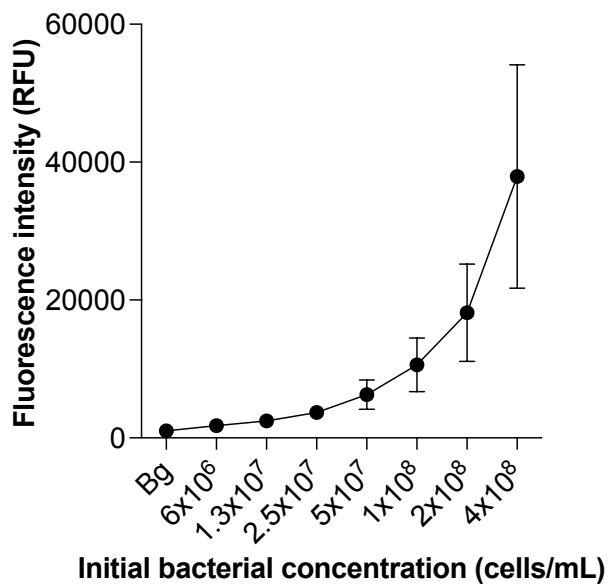

**Figure S7. Fluorescence intensity of increasing concentrations of bacterial DNA stained with 5  $\mu$ M Sytox green is not limited by the dye concentration.** Bacteria (PAO1) in medium (RPMI 1640 with 0.05% HAS) at different concentrations were vortexed together with an equal amount of chloroform, then centrifuged shortly at high speed. The aqueous phase containing the bacterial DNA was mixed in a microplate with an equal volume of SM buffer to a final volume of 100  $\mu$ L per well. Sytox green was added in a final concentration of 5  $\mu$ M. Fluorescence intensity was measured in a microplate reader (CLARIOstar, Labtech) with the following settings:  $\lambda_{\text{excitation}} = 490$  nm, bandwidth = 14 nm;  $\lambda_{\text{emission}} = 537$  nm, bandwidth 30 nm; gain = 1300. Data represent mean  $\pm$  SD of three biological replicates.

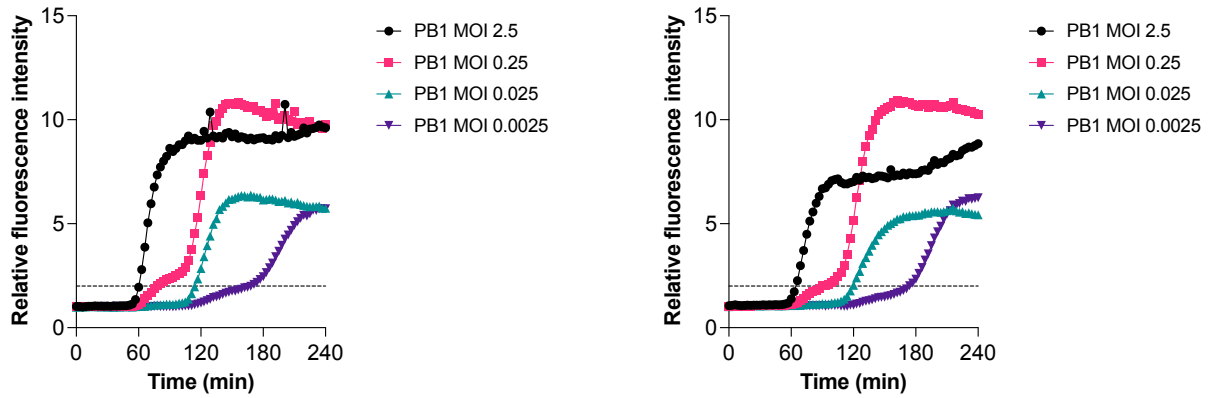

**Figure S8. Relative fluorescence intensity over time of PAO1 expressing a luciferase reporter system incubated with phage PB1 (different MOIs) at 37°C in presence of Sytox green.** Sytox green fluorescence intensity was measured using a fluorometer. Values were divided by the control signal (uninfected bacteria) to obtain relative fluorescence intensity. Black dotted line represents the threshold for phage-mediated damage (relative fluorescence = 2). Two additional replicates to figure 3a are shown.

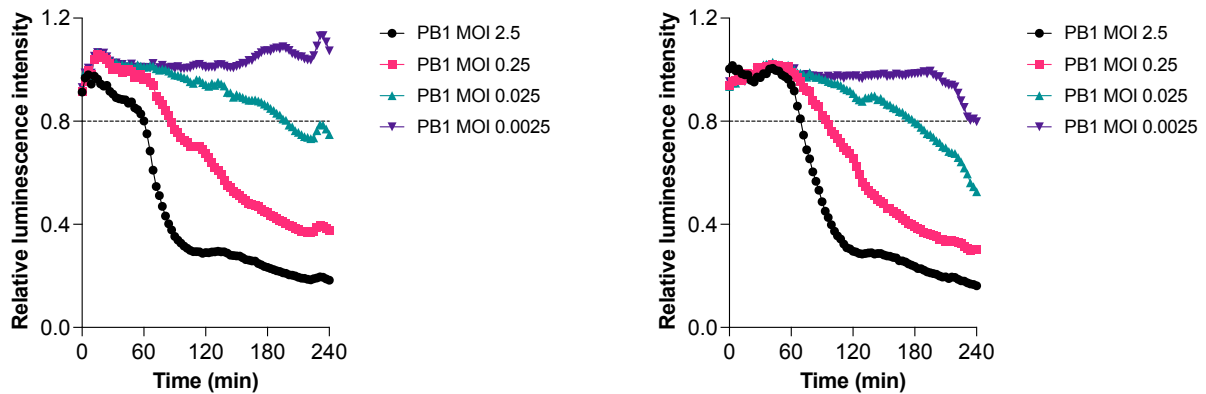

**Figure S9. Relative luminescence intensity over time of PAO1 expressing a luciferase reporter system incubated with phage PB1 (different MOIs) at 37°C in presence of Sytox green.** Luminescence intensity values were divided by the control signal (uninfected bacteria) to obtain relative fluorescence intensity. Black dotted line represents the threshold for phage-mediated damage (relative fluorescence = 2). Two additional replicates to figure 3b are shown.

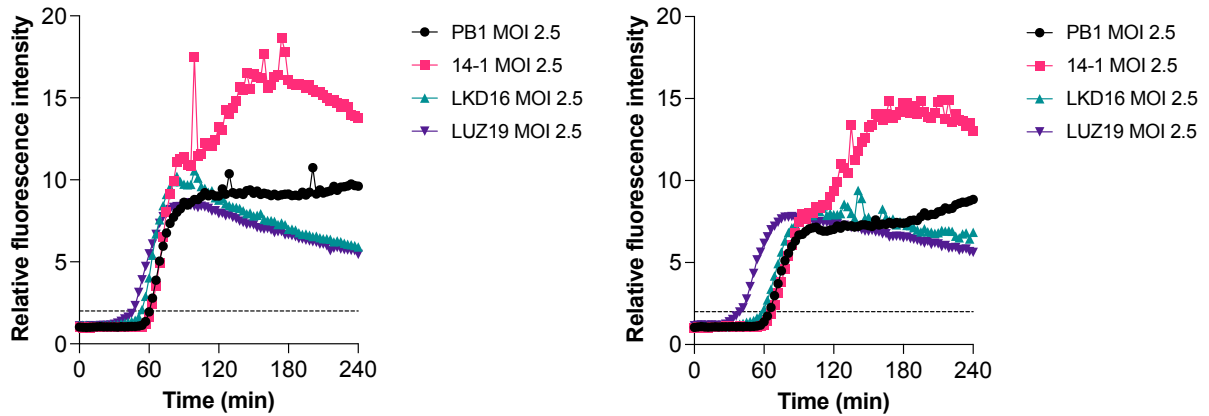

**Figure S10. Relative fluorescence intensity over time of PAO1 expressing a luciferase reporter system incubated with phages (MOI = 2.5) at 37°C in presence of Sytox green.** Sytox green fluorescence intensity was measured using a fluorometer. Values were divided by the control signal (uninfected bacteria) to obtain relative fluorescence intensity. Black dotted line represents the threshold for phage-mediated damage (relative fluorescence = 2). Two additional replicates to figure 4a are shown.

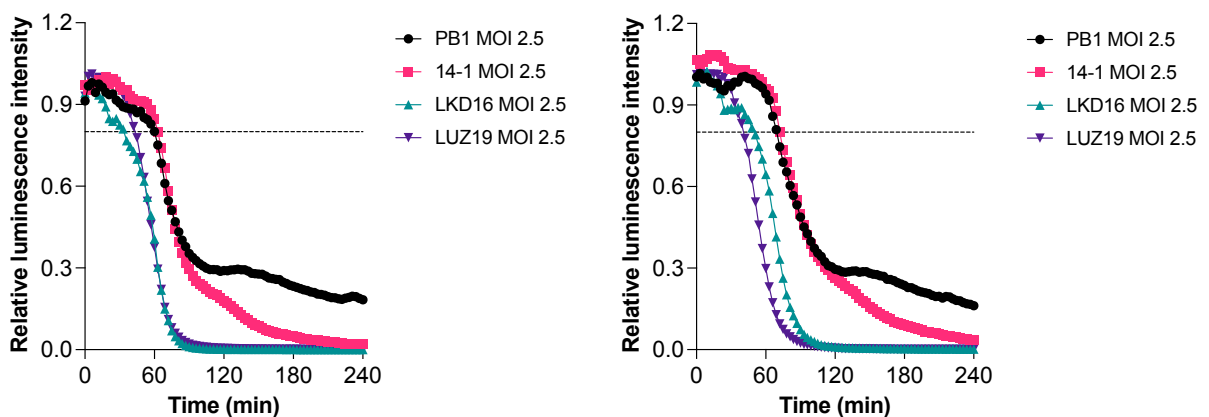

**Figure S11. Relative luminescence intensity over time of PAO1 expressing a luciferase reporter system incubated with phages (MOI = 2.5) at 37°C in presence of Sytox green.** Luminescence intensity values were divided by the control signal (uninfected bacteria) to obtain relative fluorescence intensity. Black dotted line represents the threshold for phage-mediated damage (relative fluorescence = 2). Two additional replicates to figure 4b are shown.

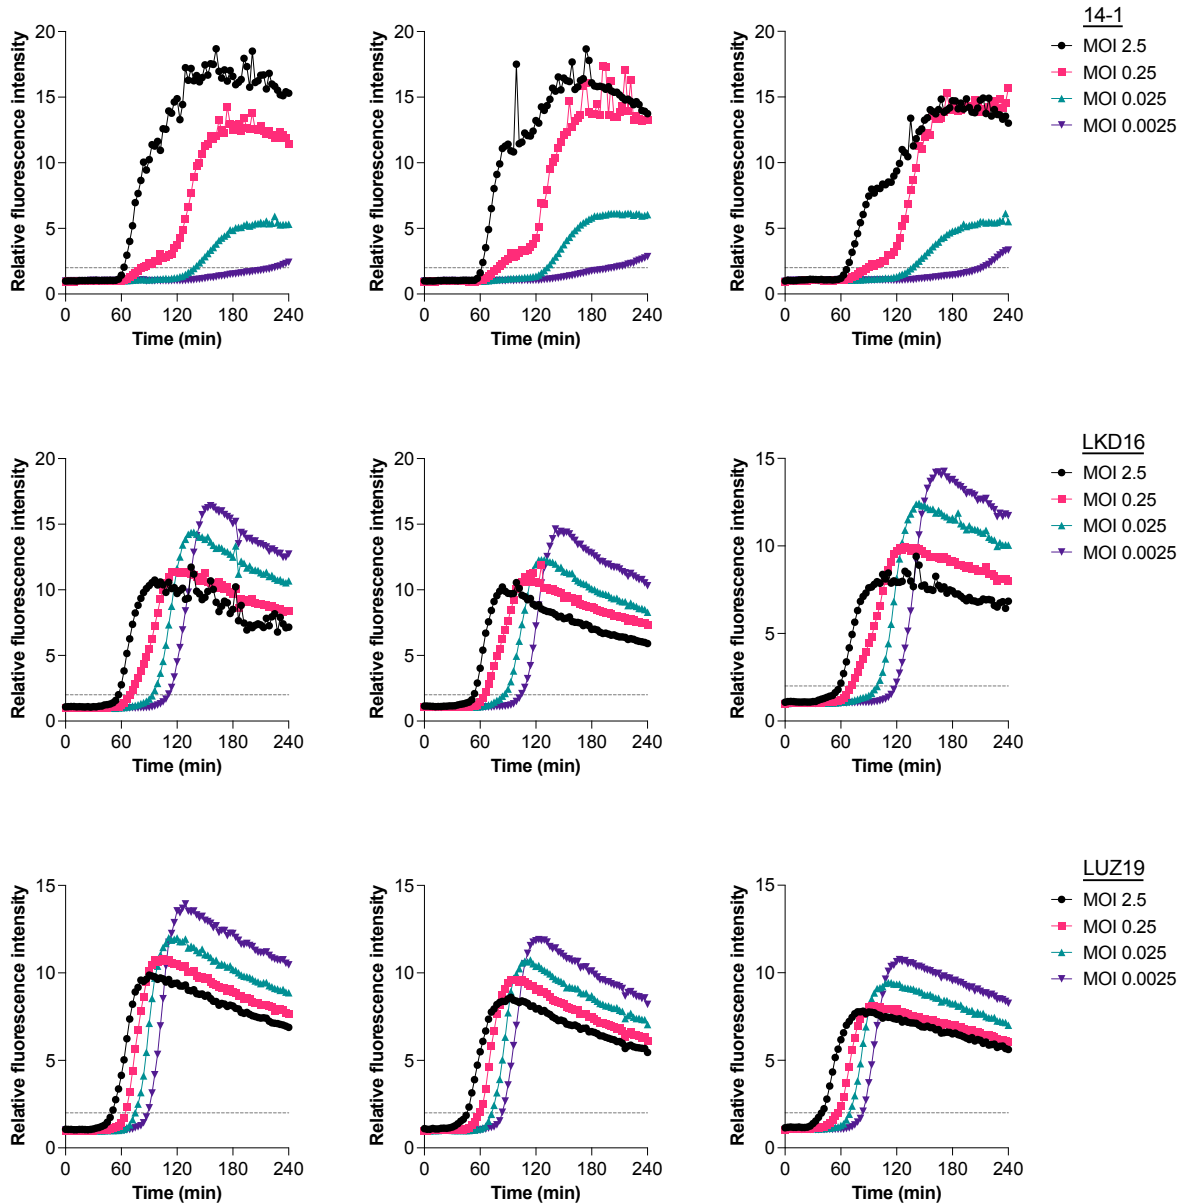

**Figure S12. Relative fluorescence intensity over time of PAO1 expressing a luciferase reporter system incubated with phages (different MOIs) at 37°C in presence of Sytox green.** Sytox green fluorescence intensity for phages 14-1, LKD16 and LUZ19 was measured using a fluorometer. Values were divided by control signal to obtain relative fluorescence intensity. Black dotted line represents threshold for phage-mediated damage (relative fluorescence = 2). Three independent experiments are shown.

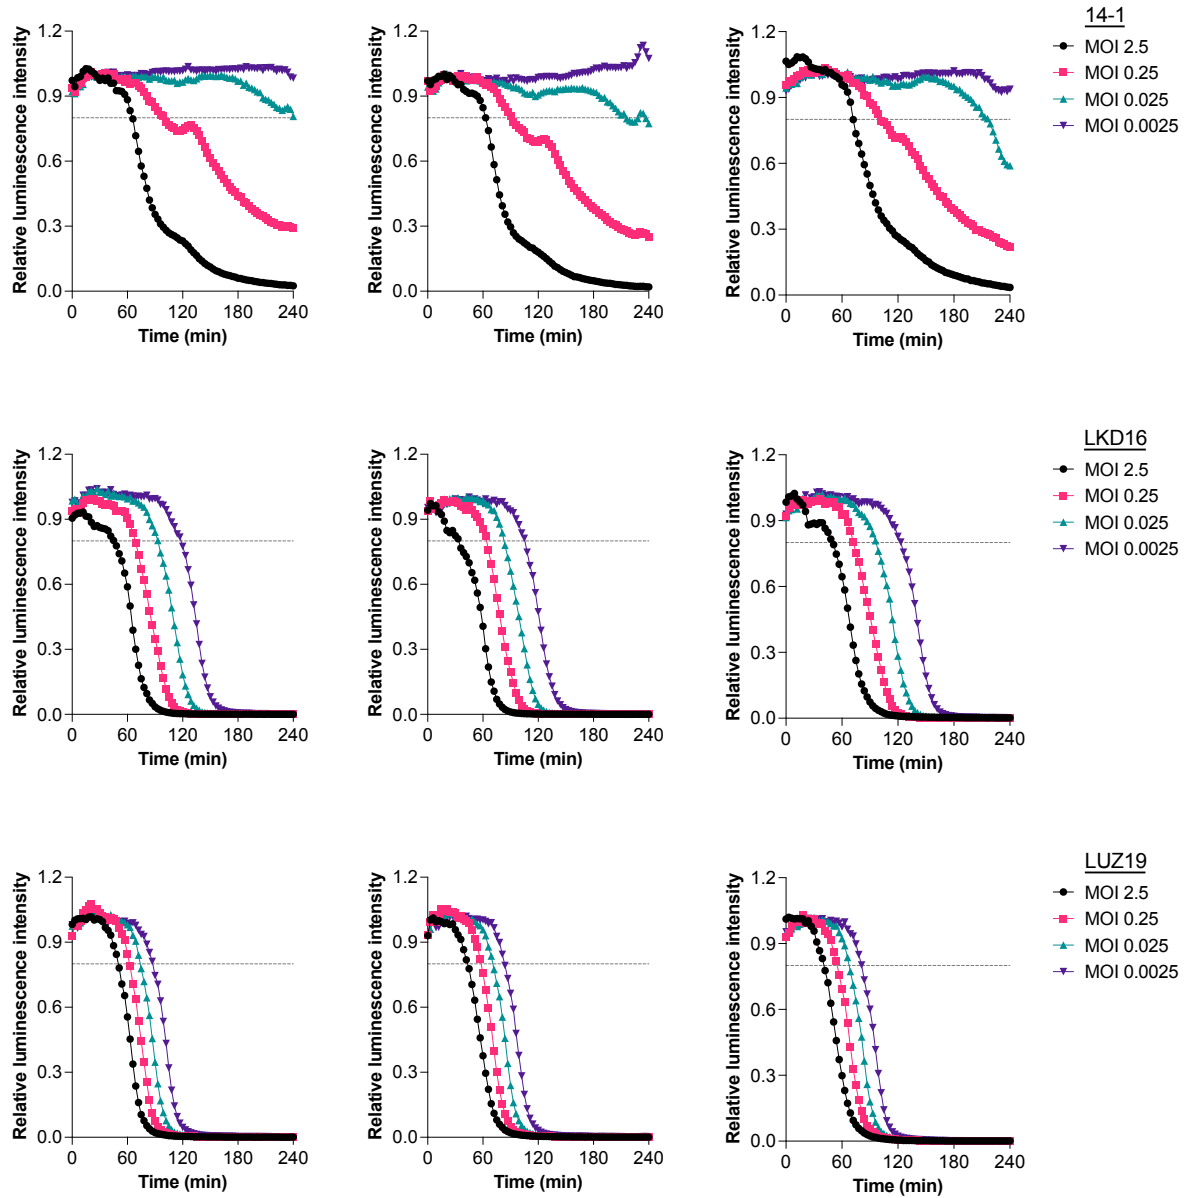

**Figure S13. Relative luminescence intensity over time of PAO1 expressing a luciferase reporter system incubated with phages (different MOIs) at 37°C in presence of Sytox green. Luminescence intensity for phages 14-1, LKD16 and LUZ19 was measured. Values were divided by control signal to obtain relative luminescence intensity. Black dotted line represents threshold for phage-mediated damage (relative luminescence = 0.8). Three independent experiments are shown.**

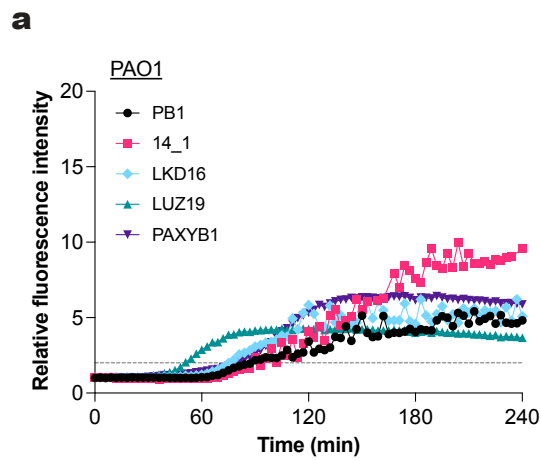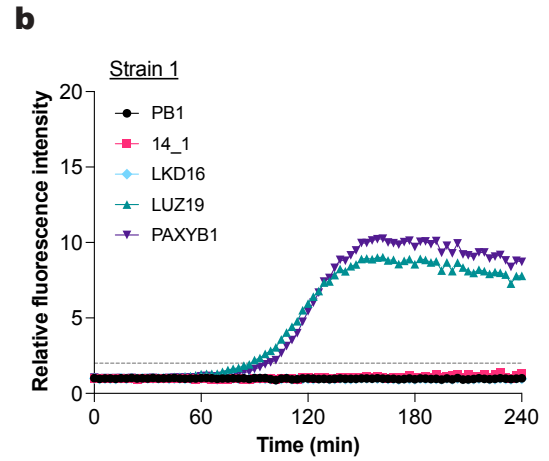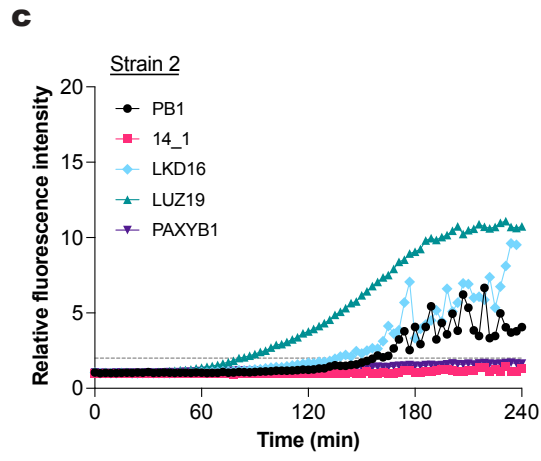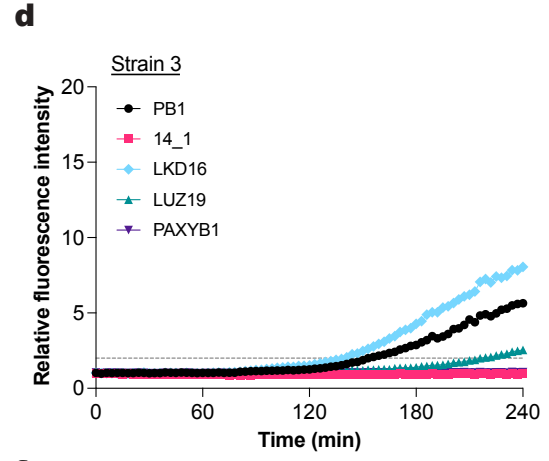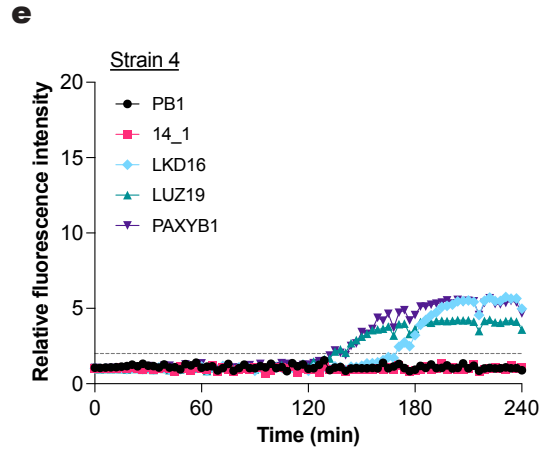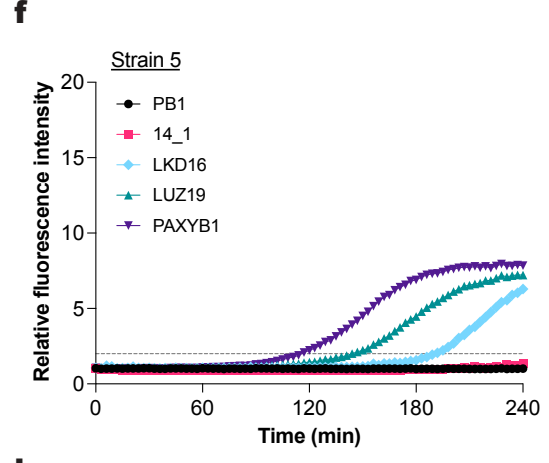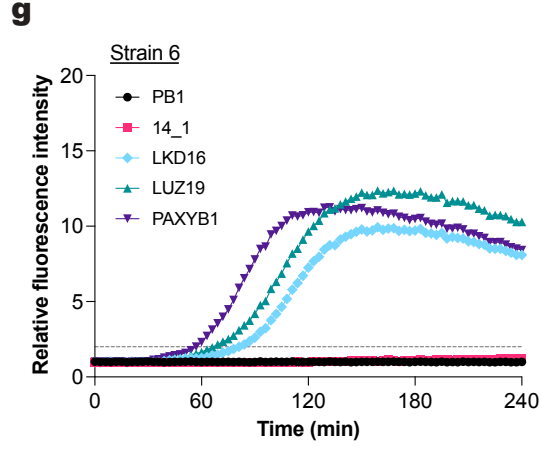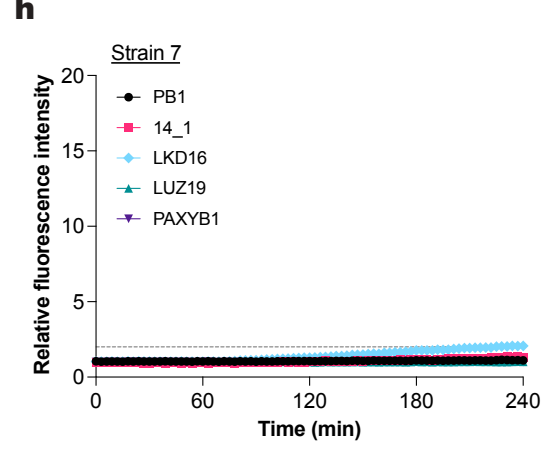



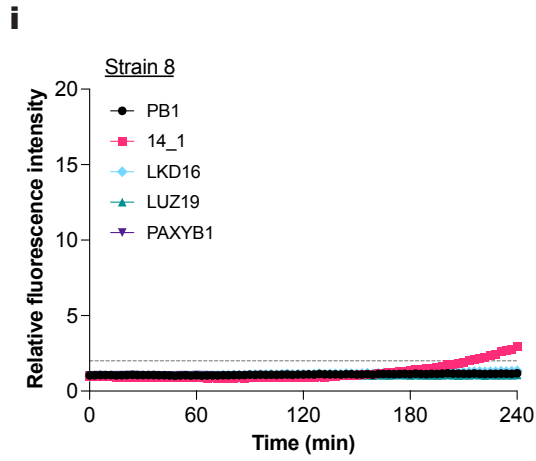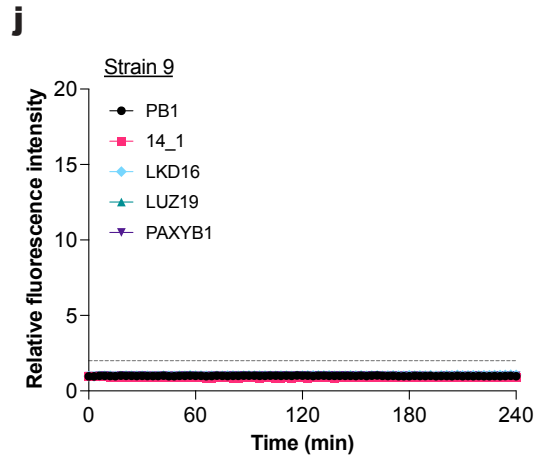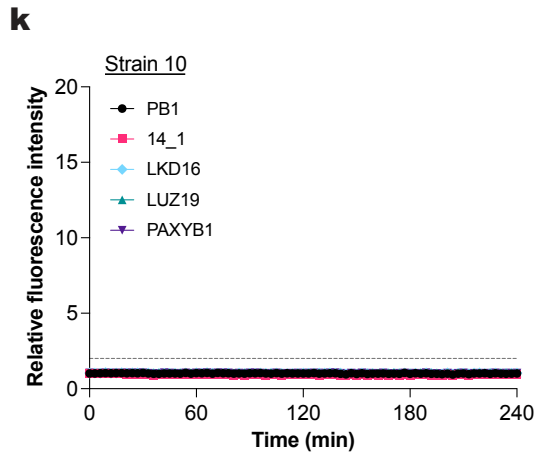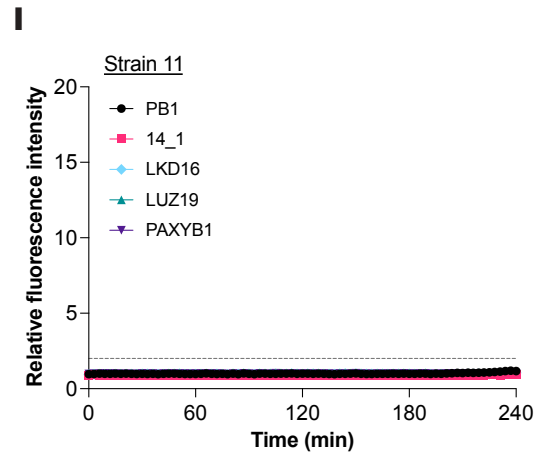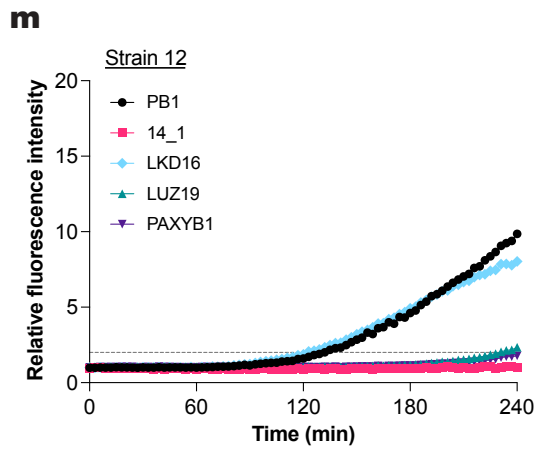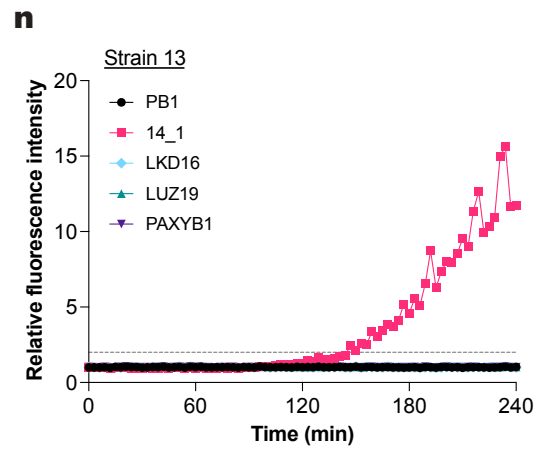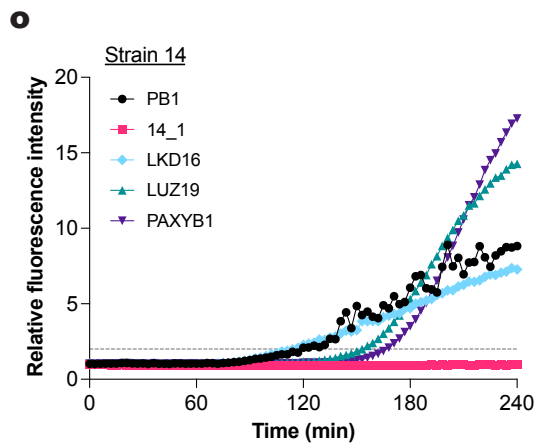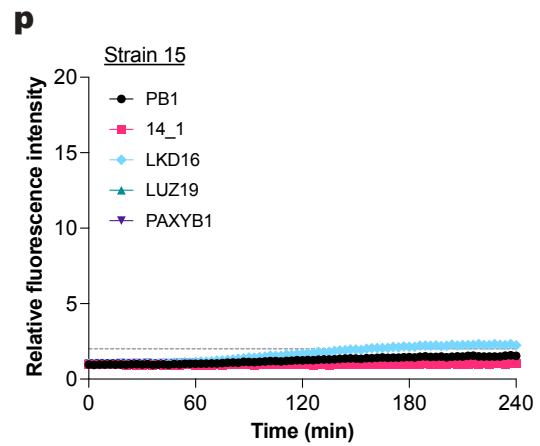

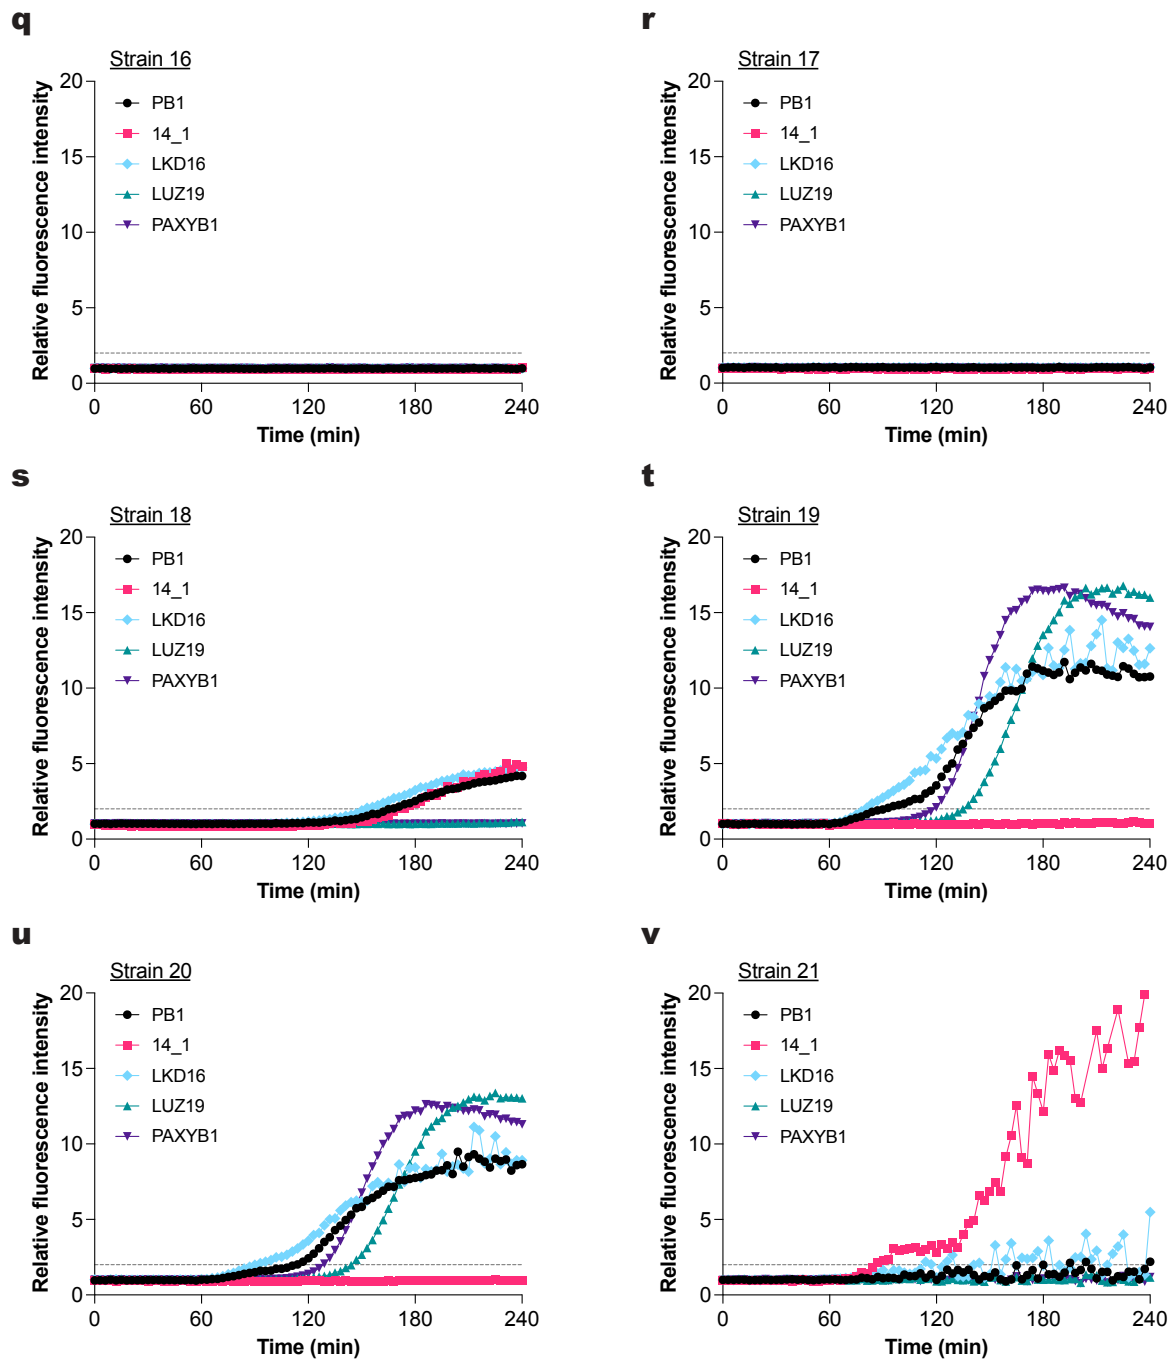

**Figure S14: Phage susceptibility profiling of several *P. aeruginosa* clinical strains obtained from patients at the UMC Utrecht, as determined by fluorescent DNA dye assay. a-v) Strains were incubated with phages PB1, 14-1, LKD16, LUZ19 or PAXYB1 at an MOI of 1 at 37°C in the presence of Sytox green. Fluorescence intensity was measured using a fluorometer, and values were divided by control signal to obtain relative fluorescence intensity. Black dotted line represents threshold for phage-mediated damage (relative fluorescence = 2). A representative graph of at least three independent experiments is shown.**

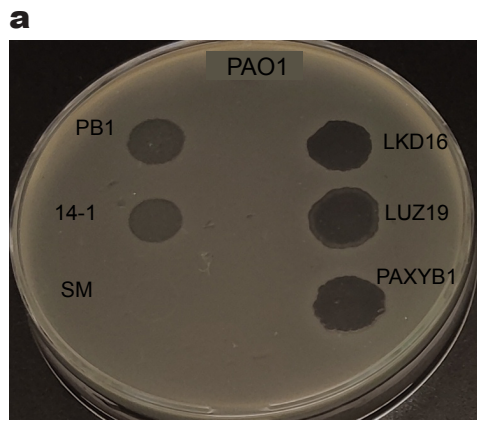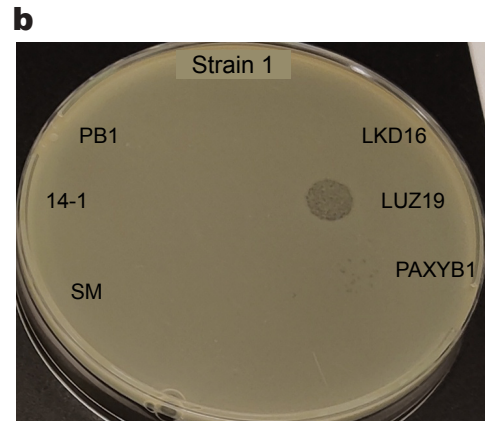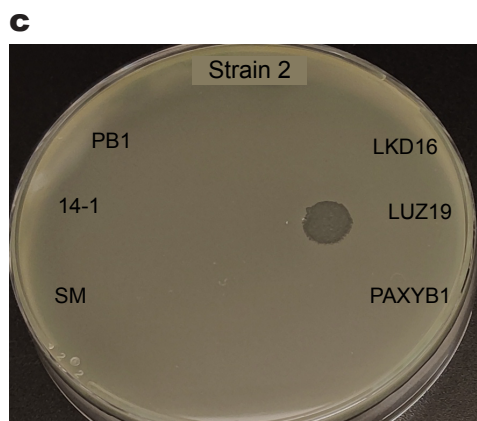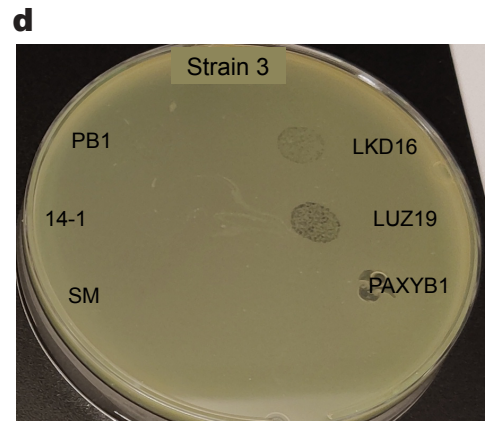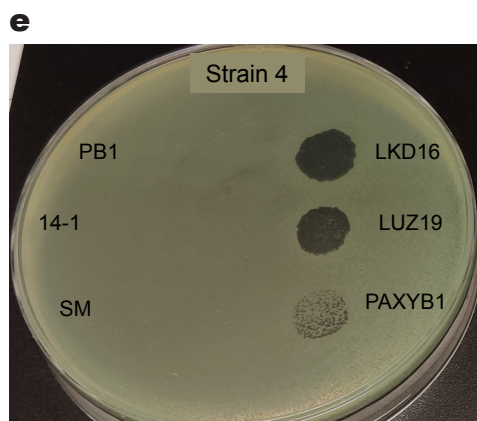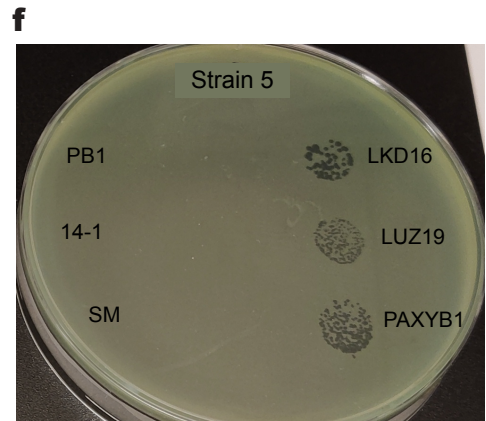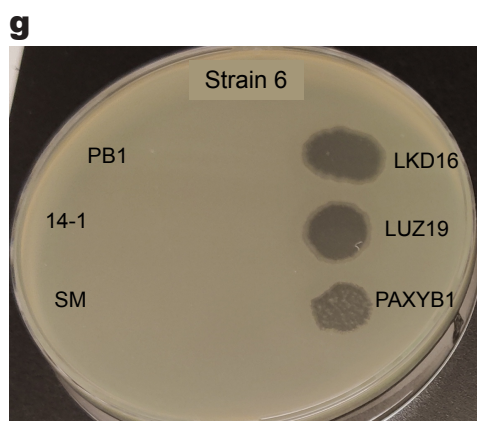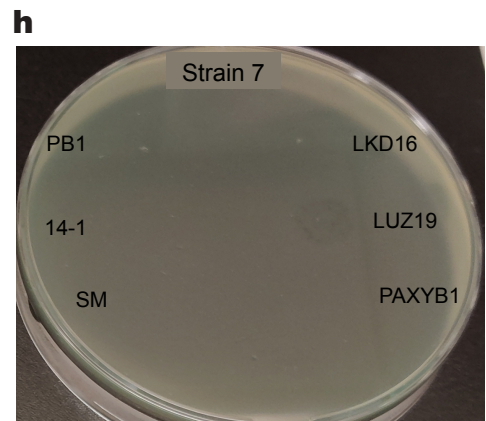

**i**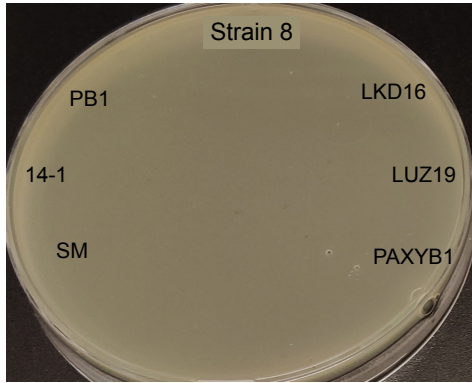**j**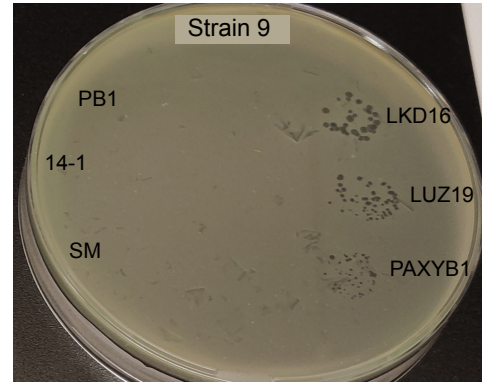**k**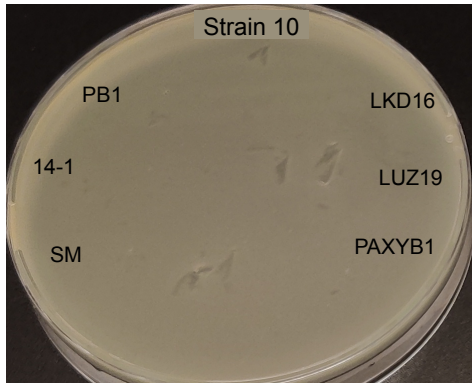**l**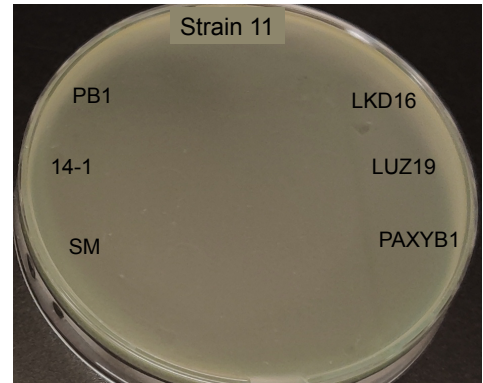**m**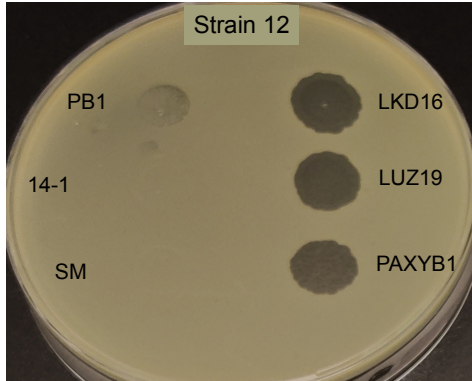**n**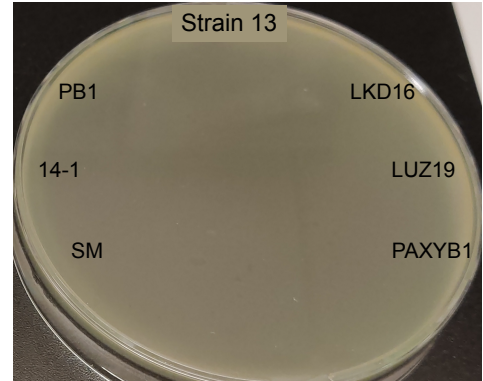**o**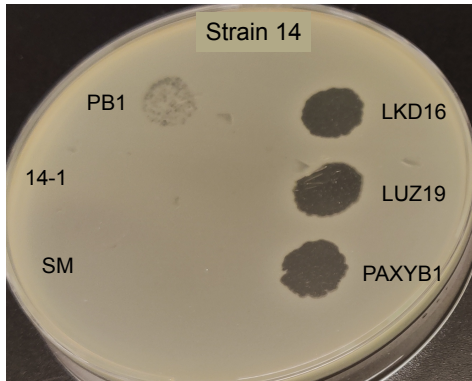**p**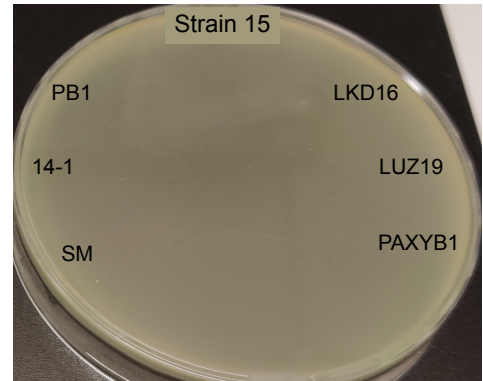



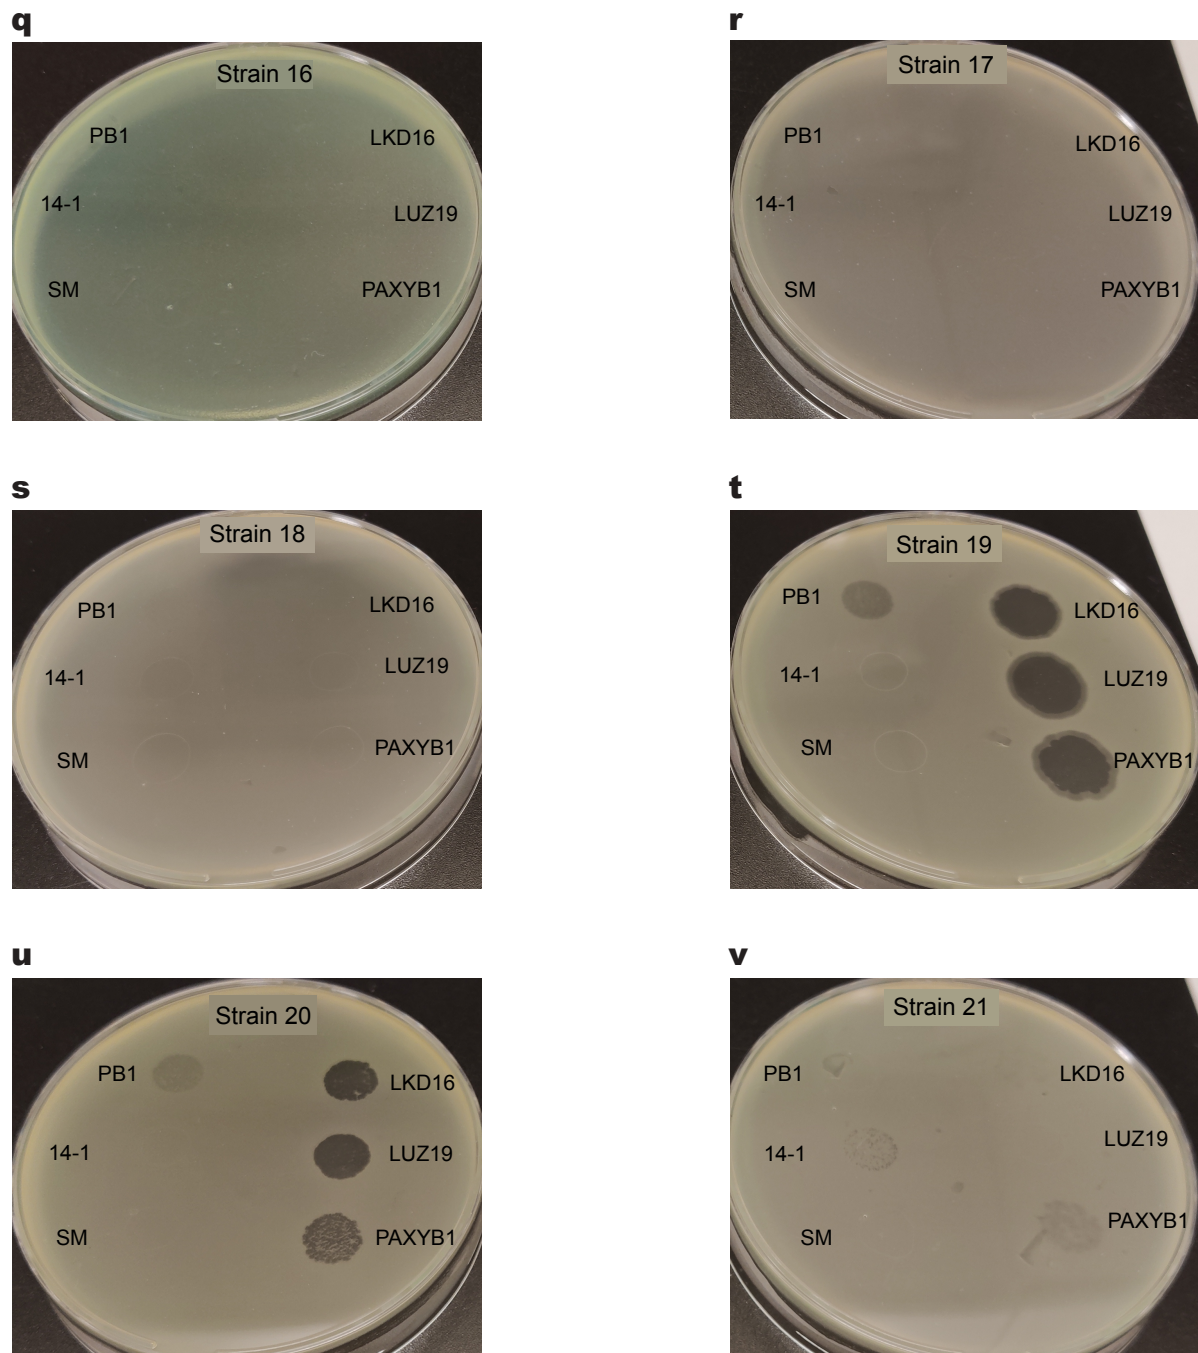

**Figure S15: Phage susceptibility profiling of several *P. aeruginosa* clinical strains obtained from patients at the UMC Utrecht, as determined by plaque assays. a-v) Strains were inoculated into top agar and overlaid on a plate. Phages PB1, 14-1, LKD16, LUZ19 and PAXYB1 ( $10^6$  pfu/mL, 5  $\mu$ L) and SM buffer (5  $\mu$ L) were spotted to detect plaque formation after overnight incubation at 37°C.**

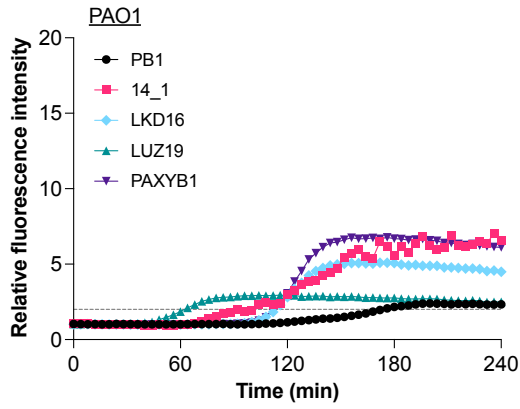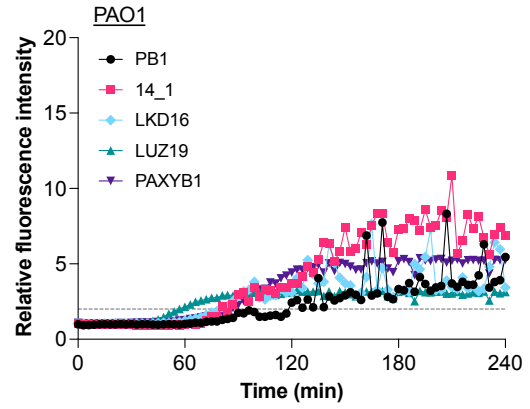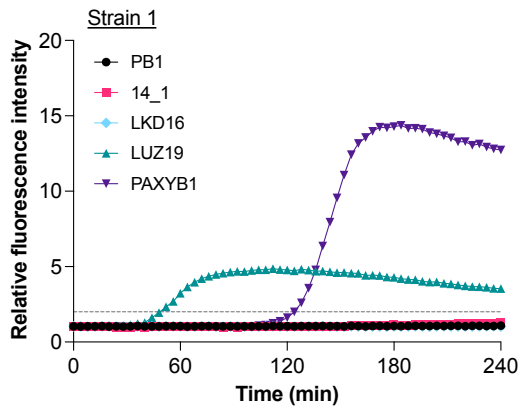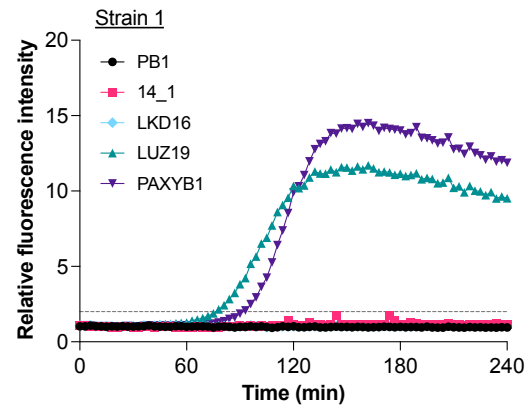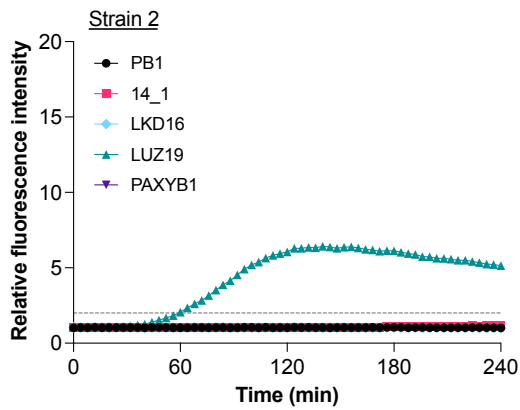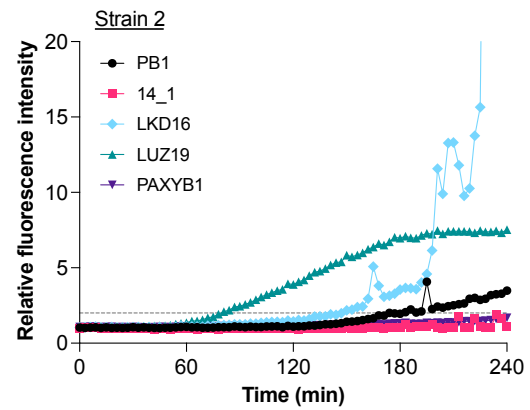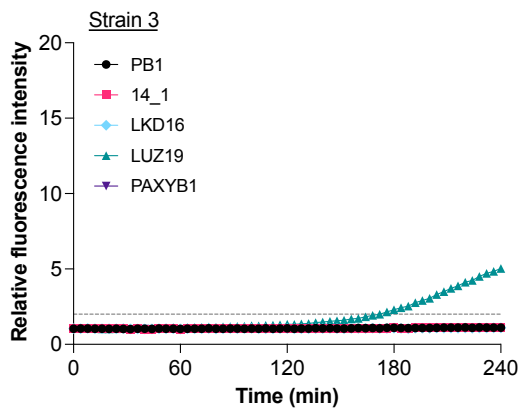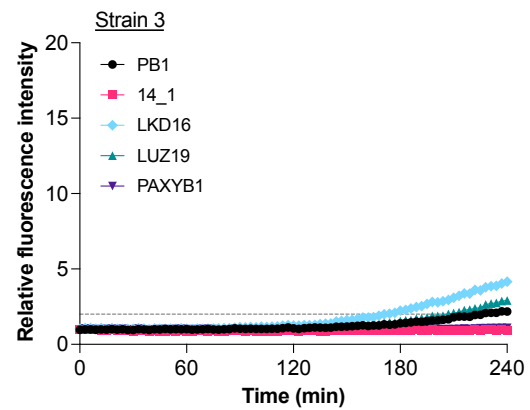

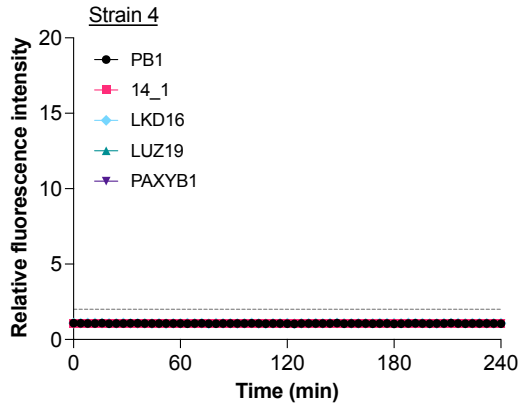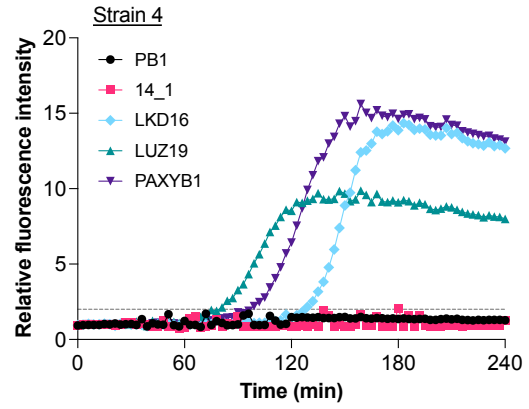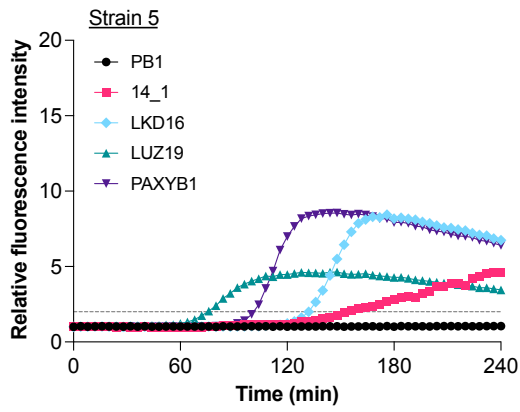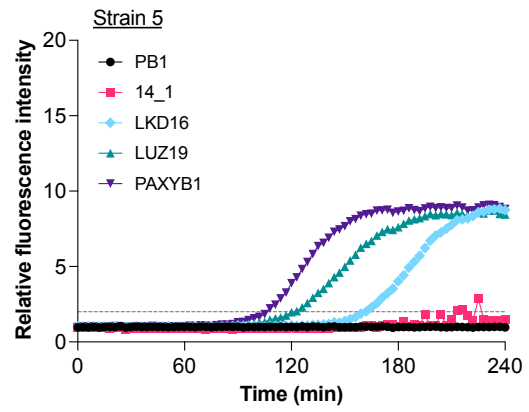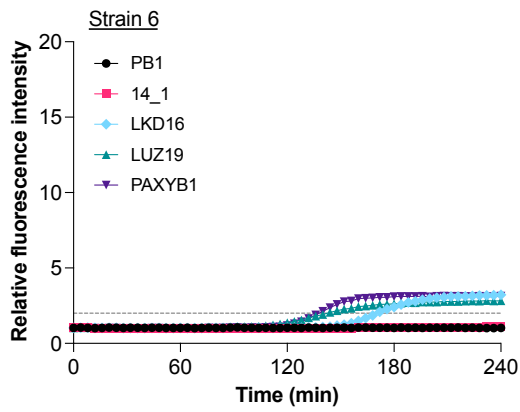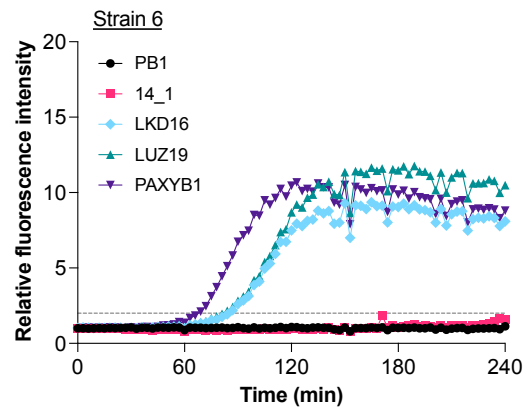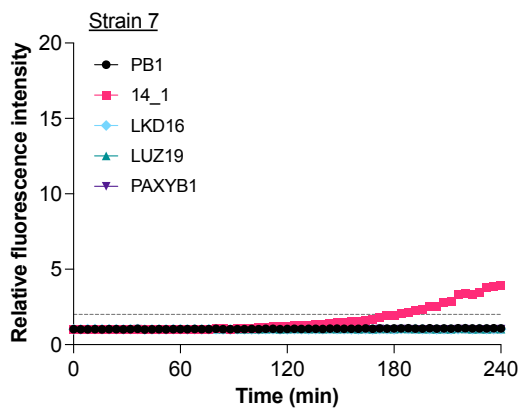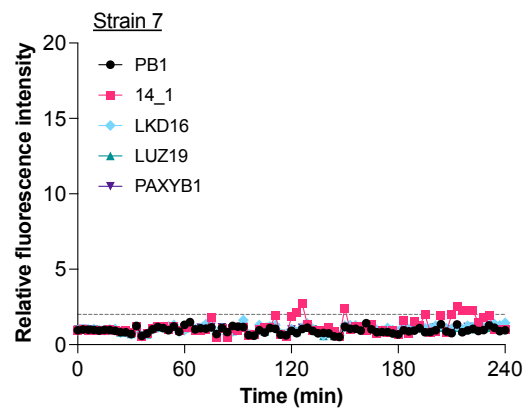

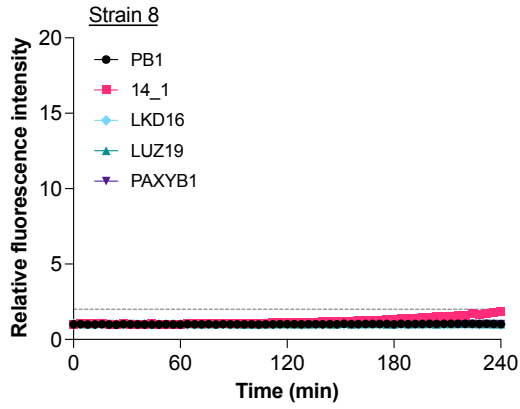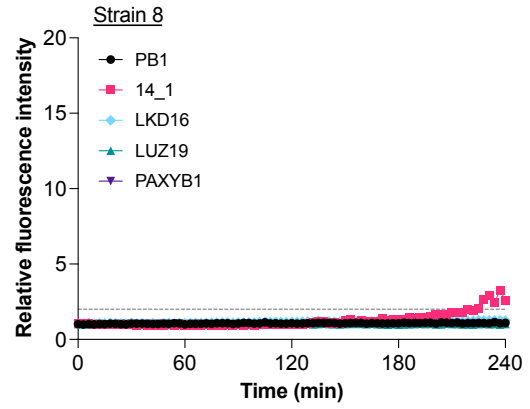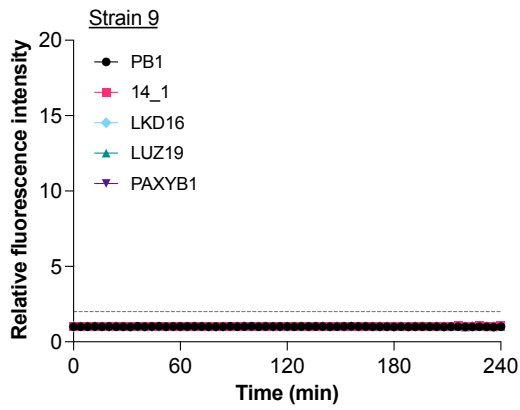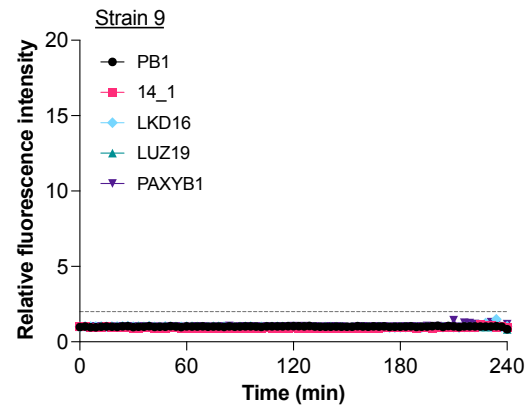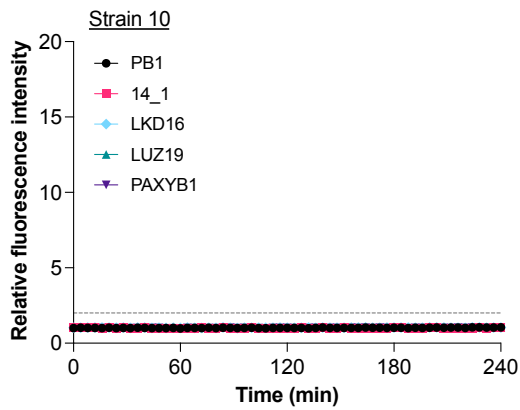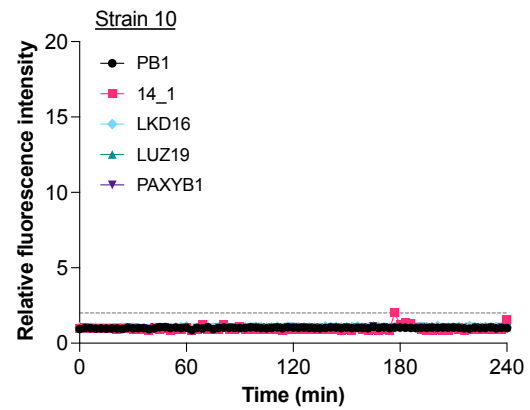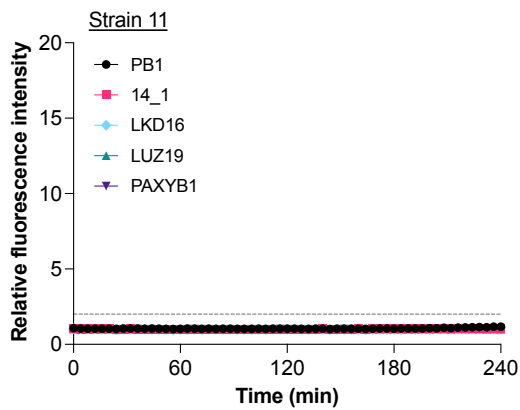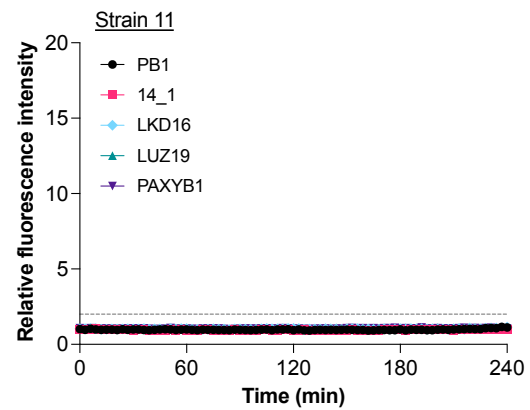



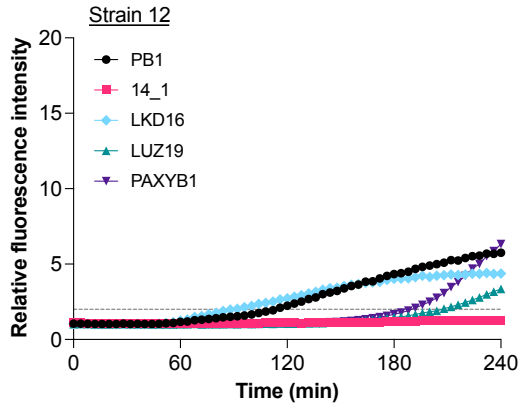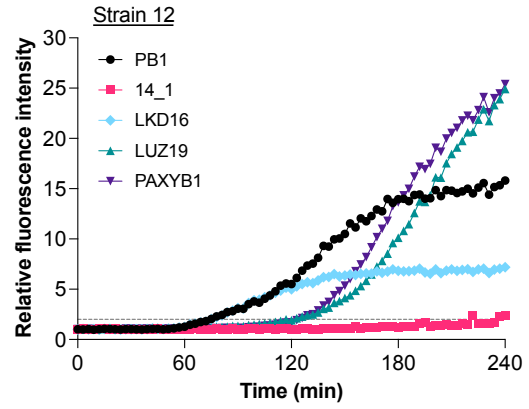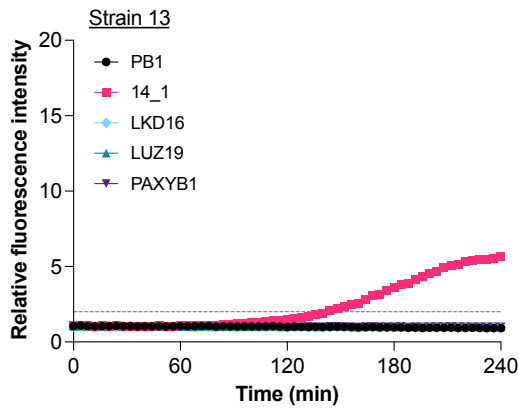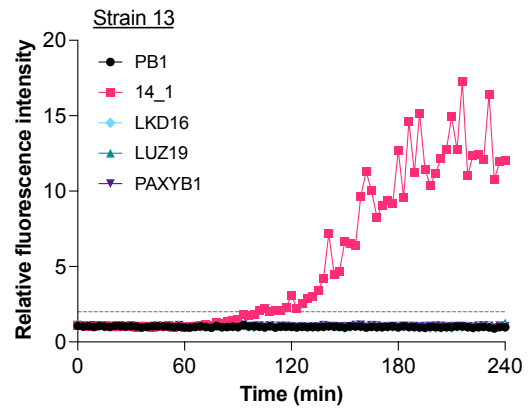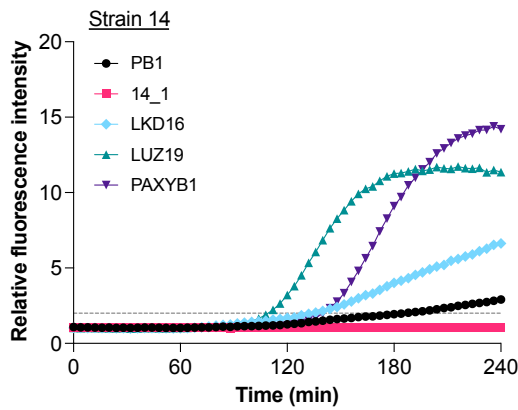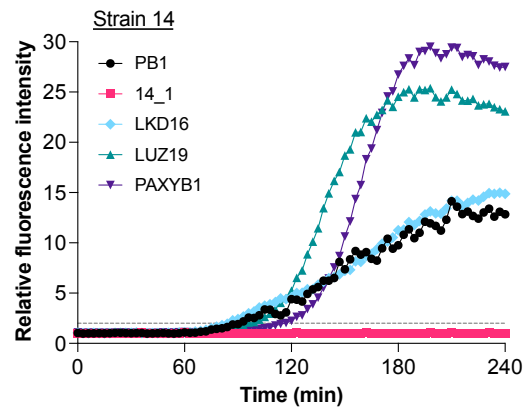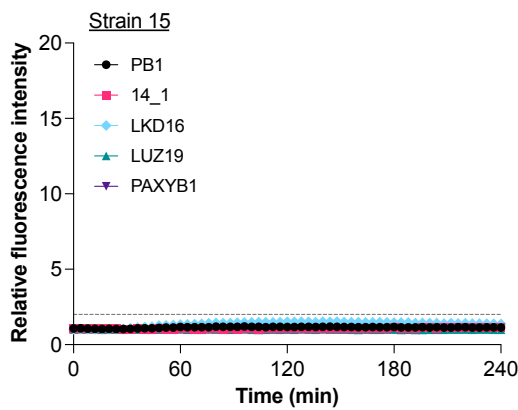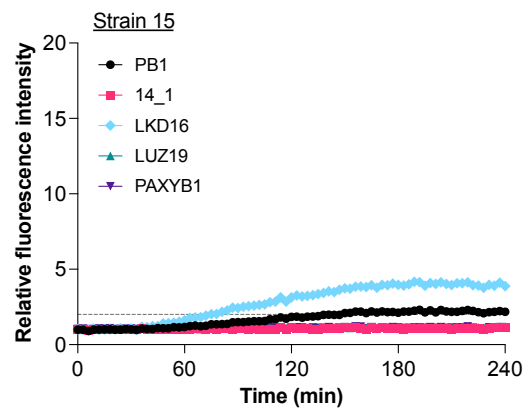

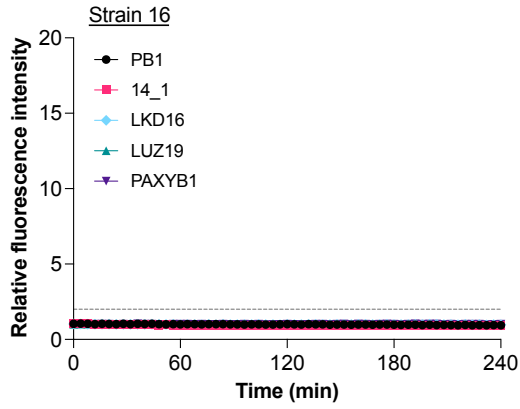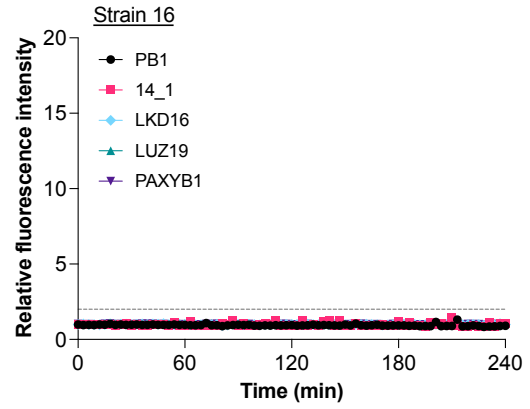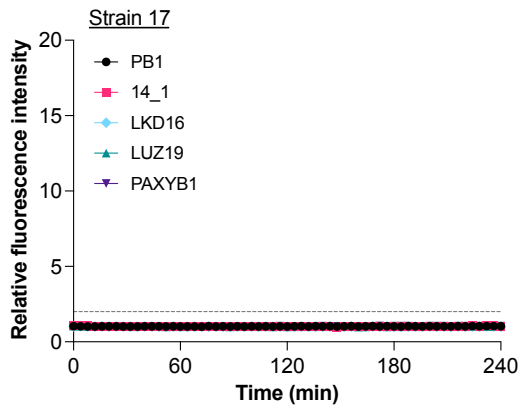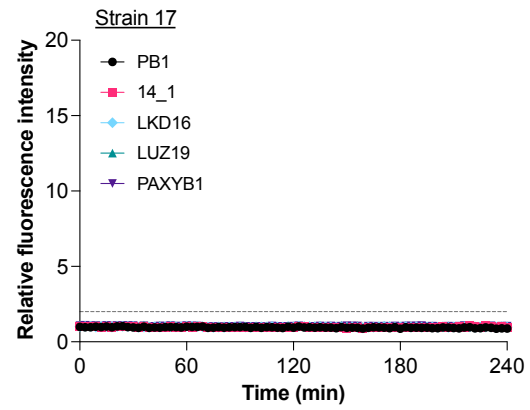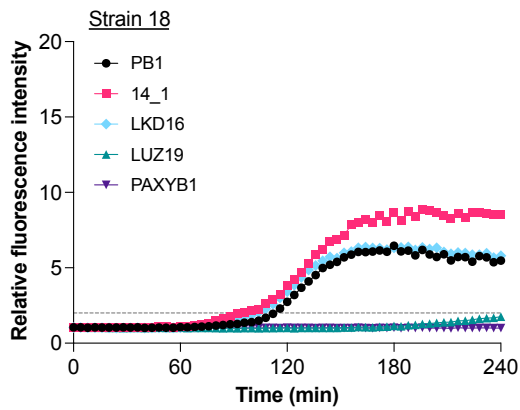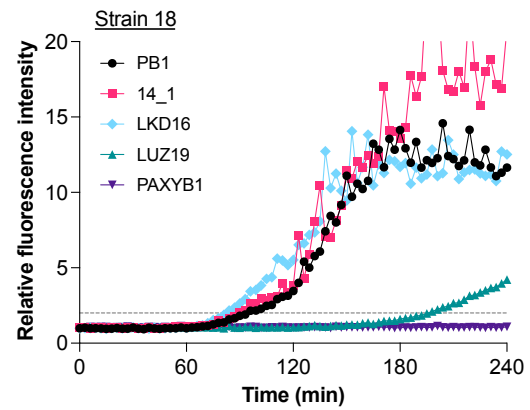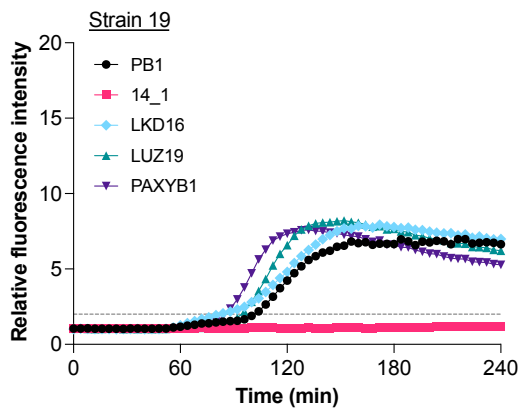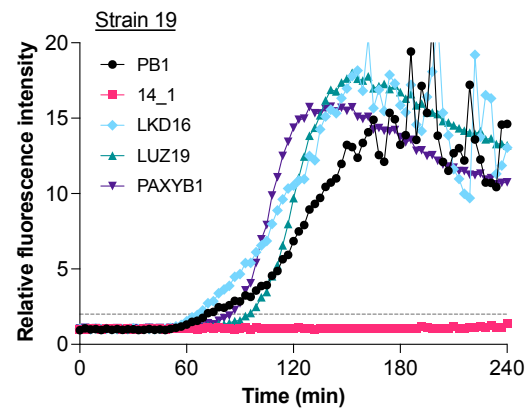

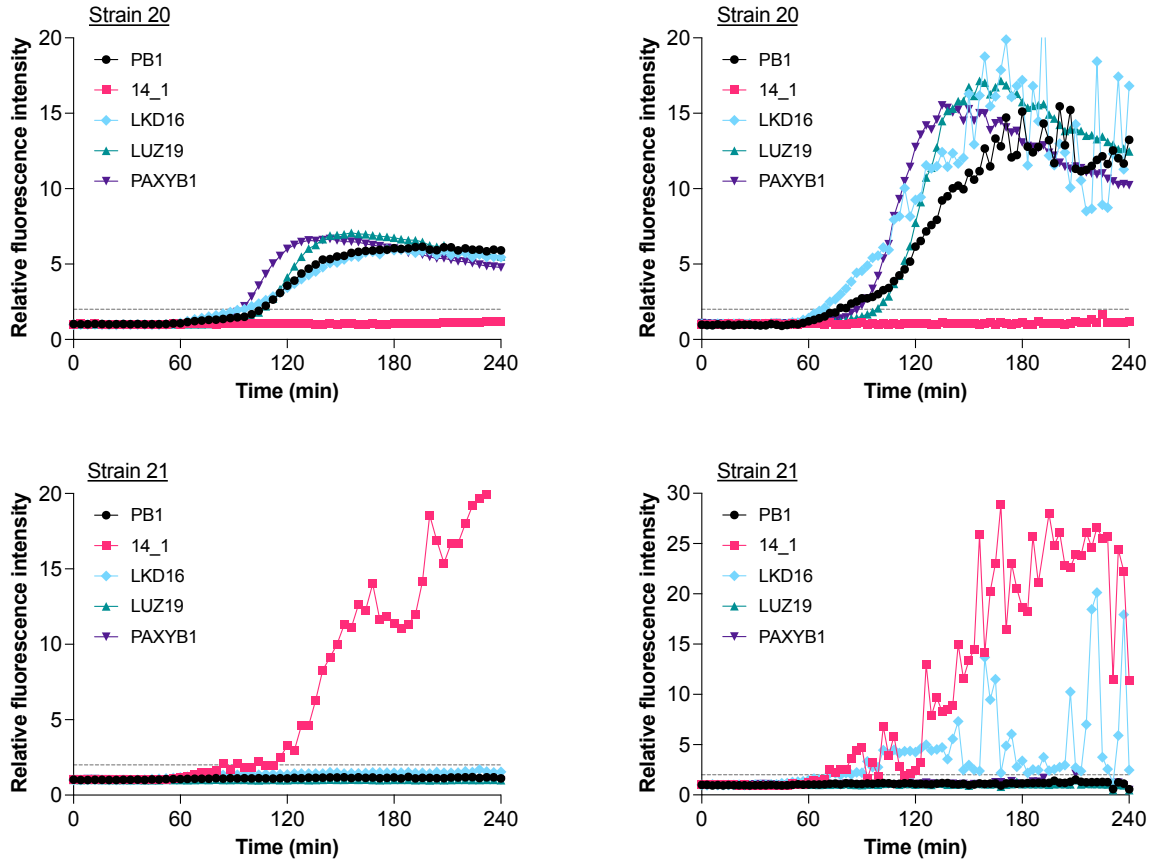

**Figure S16: Phage susceptibility profiling of several *P. aeruginosa* clinical strains obtained from patients at the UMC Utrecht, as determined by fluorescent DNA dye assay.** Strains were incubated with phages PB1, 14-1, LKD16, LUZ19 or PAXYB1 at an MOI of 1 at 37°C in the presence of Sytox green. Fluorescence intensity was measured using a fluorometer, and values were divided by control signal to obtain relative fluorescence intensity. Black dotted line represents threshold for phage-mediated damage (relative fluorescence = 2). A representative graph of at least three independent experiments is shown. Two additional replicates to figure S14 are shown.
